# Supplementary material for: Clinical and Genetic Re-Evaluation of Inherited Retinal Degeneration Pedigrees following Initial Negative Findings on Panel-Based Next Generation Sequencing
Source: MDPI journal article supplement (doi:10.3390/ijms23020995), 2022-01-17
Supplement: s1 [file s1]

| TCD             |                 |               | Blueprint       |                  |               |                 |
|-----------------|-----------------|---------------|-----------------|------------------|---------------|-----------------|
| ABCA4           | IMPDH1          | RP1           | ABCA4           | EMC1             | MVK           | SLC24A1         |
| ABCC6           | IMPG1           | RP1L1         | ABCC6           | <b>ESPN</b>      | MYO7A         | SLC25A46        |
| ABHD12          | IMPG2           | RP2           | <b>ABCD1</b>    | EXOSC2           | <b>NAGLU</b>  | <b>SLC45A2</b>  |
| <b>ACBD5</b>    | INPP5E          | <b>RP9</b>    | ABHD12          | EYS              | NDP           | SLC7A14         |
| ADAM9           | INVS            | RPE65         | <b>ACO2</b>     | FAM161A          | NEK2#         | SNRNP200        |
| ADAMTS18        | IQCB1           | RPGR          | ADAM9           | <b>FDXR</b>      | NMNAT1#       | SPATA7          |
| <b>ADGRA3</b>   | <b>ITM2B</b>    | RPGRIP1       | ADAMTS18        | FLVCR1           | NPHP1         | SPP2            |
| ADGRV1          | JAG1            | RPGRIP1L      | ADGRV1          | <b>FRMD7</b>     | NPHP3         | SRD5A3          |
| ADIPOR1         | KCNJ13          | RS1           | ADIPOR1         | FZD4             | NPHP4         | <b>TCTN1#</b>   |
| AGBL5           | KCNV2           | RTN4IP1       | AGBL5           | GNAT1            | NR2E3         | <b>TCTN2</b>    |
| AHI1            | KIAA1549        | SAG           | AHI1            | GNAT2            | NR2F1         | <b>TCTN3</b>    |
| AIPL1           | KIF11           | SDCCAG8       | AIPL1           | GNB3             | NRL           | TEAD1           |
| ALMS1           | KIZ             | SEMA4A        | ALMS1           | GNPTG            | NYX           | TIMM8A          |
| ARL2BP          | KLHL7           | SLC24A1       | <b>AMACR</b>    | <b>GPR143</b>    | OAT           | TIMP3           |
| ARL3            | LAMA1           | SLC25A46      | <b>ARHGEF18</b> | GPR179           | <b>OCA2</b>   | <b>TMEM107</b>  |
| ARL6            | LCA5            | SLC7A14       | <b>ARL13B</b>   | GRK1             | OFD1          | TMEM126A        |
| <b>ASRGL1</b>   | LRAT            | SNRNP200      | ARL2BP          | GRM6             | OPA1          | <b>TMEM138</b>  |
| ATF6            | LRIT3           | SPATA7        | ARL3            | GUCA1A           | OPA3          | TMEM216         |
| <b>ATXN7</b>    | LRP5            | SPP2          | ARL6            | GUCY2D           | OPN1SW        | <b>TMEM231</b>  |
| BBIP1           | LZTFL1          | TEAD1         | <b>ARMC9</b>    | HARS             | OTX2          | TMEM237         |
| BBS1            | MAK             | TIMM8A        | <b>ARR3</b>     | HGSNAT           | <b>P3H2</b>   | <b>TMEM67</b>   |
| BBS10           | <b>MAPKAPK3</b> | TIMP3         | <b>ARSG</b>     | HK1#             | PANK2         | TOPORS          |
| BBS12           | MERTK           | TMEM126A      | ATF6            | HMX1             | PAX2          | <b>TPP1</b>     |
| BBS2            | MFN2            | TMEM216       | <b>ATOH7</b>    | <b>IDH3A</b>     | PCDH15        | <b>TRAF3IP1</b> |
| BBS4            | MFRP            | TMEM237       | <b>B9D1</b>     | IDH3B            | PCYT1A        | TREX1           |
| BBS5            | MFSD8           | TOPORS        | <b>B9D2</b>     | IFT140           | PDE6A         | TRIM32          |
| BBS7            | <b>MIR204</b>   | TREX1         | BBIP1           | IFT172           | PDE6B         | TRPM1           |
| BBS9            | MKKS            | TRIM32        | BBS1            | IFT27            | PDE6C         | TSPAN12         |
| BEST1           | MKS1            | <b>TRNT1</b>  | BBS10           | <b>IFT81#</b>    | <b>PDE6D</b>  | <b>TTC21B</b>   |
| <b>C12orf65</b> | MTTP            | TRPM1         | BBS12           | IMPDH1           | PDE6G         | TTC8            |
| C1QTNF5         | MVK             | TSPAN12       | BBS2            | IMPG1            | PDE6H         | TTLL5           |
| C21orf2         | MYO7A           | TTC8          | BBS4            | IMPG2            | <b>PDSS1#</b> | TTPA            |
| C2orf71         | <b>NBAS</b>     | TTLL5         | BBS5            | INPP5E           | <b>PDSS2</b>  | TUB             |
| C8orf37         | NDP             | TTPA          | BBS7            | INVS             | PDZD7#        | <b>TUBB4B</b>   |
| CA4             | NEK2            | TUB           | BBS9            | IQCB1            | PEX1          | TUBGCP4         |
| CABP4           | <b>NEUROD1</b>  | TUBGCP4       | BEST1           | <b>ISPD</b>      | <b>PEX10</b>  | TUBGCP6         |
| CACNA1F         | NMNAT1          | TUBGCP6       | C1QTNF5         | JAG1             | <b>PEX11B</b> | TULP1           |
| CACNA2D4        | NPHP1           | TULP1         | C21ORF2         | KCNJ13           | <b>PEX12</b>  | <b>TYR</b>      |
| CAPN5           | NPHP3           | <b>UNC119</b> | C2ORF71         | KCNV2            | <b>PEX13</b>  | <b>TYRP1</b>    |
| CC2D2A          | NPHP4           | USH1C         | <b>C5ORF42</b>  | <b>KIAA0556</b>  | <b>PEX14</b>  | USH1C           |
| CDH23           | NR2E3           | USH1G         | C8ORF37         | <b>KIAA0586#</b> | <b>PEX16</b>  | USH1G           |
| CDH3            | NR2F1           | USH2A         | CA4             | <b>KIAA0753</b>  | <b>PEX19</b>  | USH2A           |
| CDHR1           | NRL             | VCAN          | CABP4           | KIAA1549         | PEX2          | VCAN            |
| CEP164          | NYX             | WDPCP         | CACNA1F         | KIF11            | <b>PEX26</b>  | <b>VPS13B</b>   |
| CEP250          | OAT             | WDR19         | CACNA2D4        | <b>KIF7</b>      | <b>PEX3</b>   | WDPCP           |
| CEP290          | OFD1            | WFS1          | CAPN5           | KIZ              | <b>PEX5</b>   | WDR19           |
| CERKL           | OPA1            | <b>WHRN</b>   | CC2D2A#         | KLHL7            | <b>PEX6</b>   | WFS1            |
| <b>CFH</b>      | OPA3            | ZNF408        | CDH23           | LAMA1            | PEX7          | <b>YME1L1</b>   |
| CHM             | <b>OPN1LW</b>   | ZNF423        | CDH3            | LCA5             | PHYH          | ZNF408          |

|               |               |        |                |                |               |        |
|---------------|---------------|--------|----------------|----------------|---------------|--------|
| CIB2          | <b>OPN1MW</b> | ZNF513 | CDHR1          | LRAT           | <b>PISD</b>   | ZNF423 |
| CLN3          | OPN1SW        |        | <b>CEP104</b>  | LRIT3          | PITPNM3       | ZNF513 |
| CLRN1         | OTX2          |        | <b>CEP120</b>  | <b>LRP2</b>    | PLA2G5        |        |
| <b>CLUAP1</b> | PANK2         |        | CEP164         | LRP5           | PLK4          |        |
| CNGA1         | PAX2          |        | <b>CEP19</b>   | LZTFL1         | PNPLA6        |        |
| CNGA3         | PCDH15        |        | CEP250         | MAK            | POC1B         |        |
| CNGB1         | PCYT1A        |        | CEP290         | MERTK          | POMGNT1       |        |
| CNGB3         | PDE6A         |        | <b>CEP41</b>   | MFN2           | <b>PPT1</b>   |        |
| CNNM4         | PDE6B         |        | <b>CEP78</b>   | MFRP           | PRCD          |        |
| COL11A1       | PDE6C         |        | <b>CEP83</b>   | MFSD8          | PRDM13        |        |
| COL2A1        | PDE6G         |        | CERKL          | MKKS           | PROM1         |        |
| COL9A1        | PDE6H         |        | CHM#           | MKS1           | PRPF3         |        |
| CRB1          | PDZD7         |        | CIB2           | <b>MMACHC</b>  | PRPF31        |        |
| CRX           | PEX1          |        | <b>CISD2</b>   | <b>MT-ATP6</b> | PRPF4         |        |
| CSPP1         | PEX2          |        | CLN3           | <b>MT-ATP8</b> | PRPF6         |        |
| CTNNA1        | PEX7          |        | <b>CLN5</b>    | <b>MT-CO1</b>  | PRPF8         |        |
| CYP4V2        | <b>PGK1</b>   |        | <b>CLN6</b>    | <b>MT-CO2</b>  | PRPH2         |        |
| DHDDS         | PHYH          |        | <b>CLN8</b>    | <b>MT-CO3</b>  | PRPS1         |        |
| DHX38         | PITPNM3       |        | CLRN1          | <b>MT-CYB</b>  | RAB28         |        |
| <b>DMD</b>    | PLA2G5        |        | CNGA1#         | <b>MT-ND1</b>  | RAX2          |        |
| DRAM2         | PLK4          |        | CNGA3          | <b>MT-ND2</b>  | RBP3          |        |
| DTHD1         | PNPLA6        |        | CNGB1          | <b>MT-ND3</b>  | RBP4          |        |
| EFEMP1        | POC1B         |        | CNGB3          | <b>MT-ND4</b>  | RCBTB1        |        |
| ELOVL4        | POMGNT1       |        | CNNM4          | <b>MT-ND4L</b> | RD3           |        |
| EMC1          | PRCD          |        | COL11A1        | <b>MT-ND5</b>  | RDH11         |        |
| EXOSC2        | PRDM13        |        | <b>COL11A2</b> | <b>MT-ND6</b>  | RDH12         |        |
| EYS           | PROM1         |        | <b>COL18A1</b> | <b>MT-RNR1</b> | RDH5          |        |
| FAM161A       | PRPF3         |        | COL2A1         | <b>MT-RNR2</b> | <b>REEP6</b>  |        |
| FLVCR1        | PRPF31        |        | COL9A1         | <b>MT-TA</b>   | RGR           |        |
| <b>FSCN2</b>  | PRPF4         |        | <b>COL9A2</b>  | <b>MT-TC</b>   | RGS9          |        |
| FZD4          | PRPF6         |        | <b>COL9A3</b>  | <b>MT-TD</b>   | RGS9BP        |        |
| <b>GDF6</b>   | PRPF8         |        | <b>COQ2</b>    | <b>MT-TE</b>   | RHO           |        |
| GNAT1         | PRPH2         |        | <b>CPE</b>     | <b>MT-TF</b>   | RIMS1         |        |
| GNAT2         | PRPS1         |        | CRB1           | <b>MT-TG</b>   | RLBP1         |        |
| GNB3          | RAB28         |        | CRX            | <b>MT-TH</b>   | ROM1          |        |
| GNPTG         | RAX2          |        | CSPP1          | <b>MT-TI</b>   | RP1           |        |
| GPR179        | <b>RB1</b>    |        | <b>CTC1</b>    | <b>MT-TK</b>   | RP1L1         |        |
| GRK1          | RBP3          |        | CTNNA1         | <b>MT-TL1</b>  | RP2           |        |
| GRM6          | RBP4          |        | <b>CTNNB1</b>  | <b>MT-TL2</b>  | RPE65         |        |
| GUCA1A        | RCBTB1        |        | <b>CTSD</b>    | <b>MT-TM</b>   | RPGR          |        |
| <b>GUCA1B</b> | RD3           |        | <b>CWC27</b>   | <b>MT-TN</b>   | RPGRIP1       |        |
| GUCY2D        | RDH11         |        | CYP4V2         | <b>MT-TP</b>   | RPGRIP1L#     |        |
| HARS          | RDH12         |        | <b>DFNB31</b>  | <b>MT-TQ</b>   | RS1           |        |
| HGSNAT        | RDH5          |        | DHDDS          | <b>MT-TR</b>   | RTN4IP1       |        |
| HK1           | RGR           |        | DHX38          | <b>MT-TS1</b>  | SAG           |        |
| <b>HMCN1</b>  | RGS9          |        | <b>DNAJC5</b>  | <b>MT-TS2</b>  | <b>SAMD11</b> |        |
| HMX1          | RGS9BP        |        | DRAM2          | <b>MT-TT</b>   | <b>SCAPER</b> |        |
| IDH3B         | RHO           |        | DTHD1          | <b>MT-TV</b>   | <b>SCLT1#</b> |        |
| IFT140        | RIMS1         |        | <b>DYNC2H1</b> | <b>MT-TW</b>   | SDCCAG8       |        |
| IFT172        | RLBP1         |        | EFEMP1         | <b>MT-TY</b>   | SEMA4A        |        |

|       |      |  |        |      |             |  |
|-------|------|--|--------|------|-------------|--|
| IFT27 | ROM1 |  | ELOVL4 | MTTP | <b>SGSH</b> |  |
|-------|------|--|--------|------|-------------|--|

Supplementary Table S1. List of the genes included on IRD panels for the research laboratory (TCD, 250 genes) and the commercial lab (Blueprint Genetics, 352 genes). Genes in **bold** text in each respective panel are not found in the other panel.
